# Supplementary material
Source: PubMed Central journal article supplement (PMC6065195)
Supplement: supp_RA118.003081_136924_1_supp_149534_p9w88t.pdf [file supp_RA118.003081_136924_1_supp_149534_p9w88t.pdf]

## Supporting Information

### Identification of novel binding sites for heparin in RPTPs: implications for proteoglycan signaling

Yasuhiro Katagiri, Ashlea A. Morgan, Panpan Yu, Nathanael J. Bangayan, Radoslaw Junka, and Herbert M. Geller

#### Figure S1

Schematic structure of RPTP $\sigma$  recombinant proteins used in this study

#### Figure S2

Similar expression levels of recombinant proteins were detected in transfected 293 cells.

#### Figure S3

Intact phosphatase domain of RPTP $\sigma$  is essential for the upregulated intracellular phosphorylation upon heparin exposure.

#### Figure S4

Size exclusion chromatography of GAGs used in this study

#### Figure S5

Heparinase treatment of transfected cells increases the sensitivity to exogenous heparin

#### Table S1

Disaccharide composition analysis of chondroitin / dermatan sulfate and heparin

#### Table S2

Potential heparin binding sites within the fourth FNIII flanking region selected by “heparin protection” assays

#### Table S3

DNA plasmids and oligonucleotides used in this study

# Figure S1

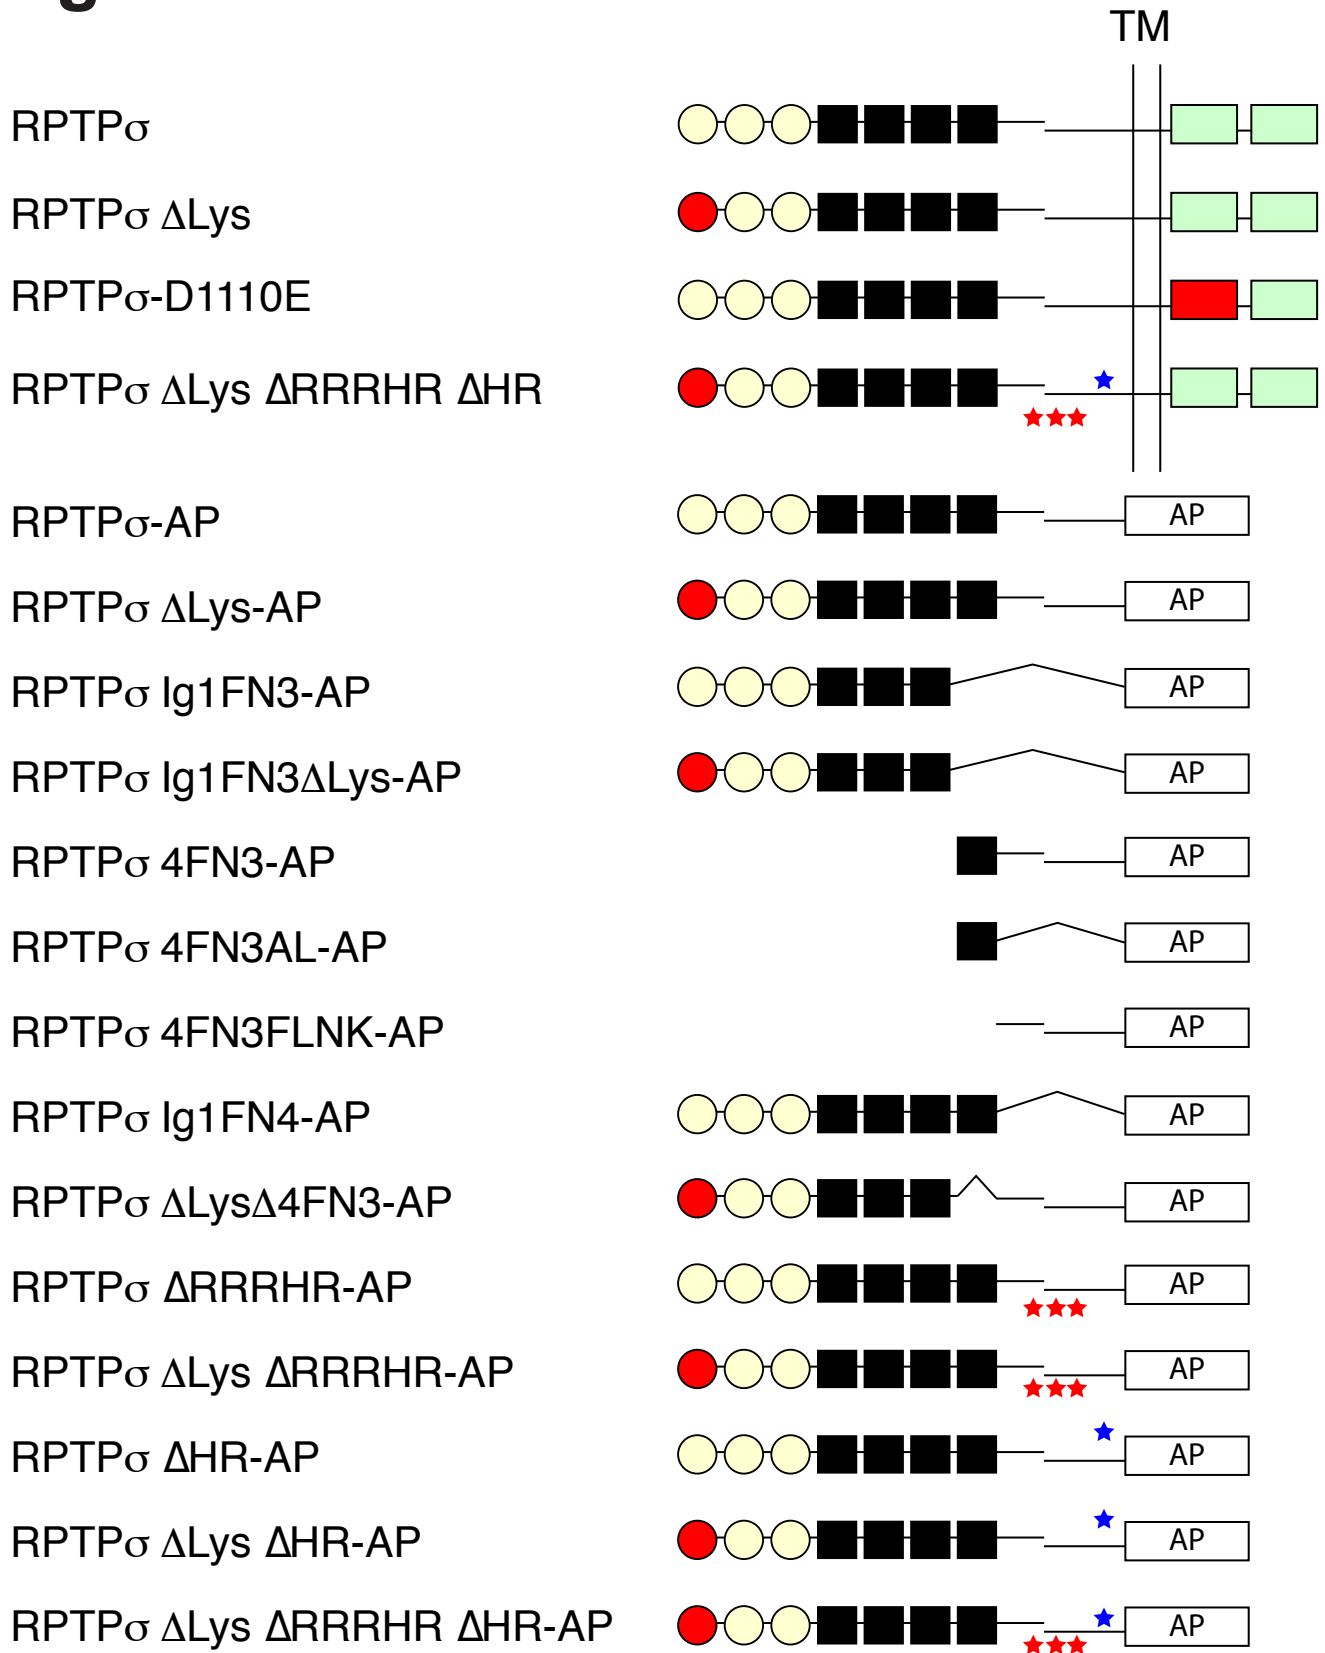

○ Ig domain      ■ FNIII domain      □ Phosphatase domain

●  $\Delta$ Lys mutation      ★★★  $\Delta$ RRRHR mutation      ★  $\Delta$ HR mutation

**Schematic structure of RPTP $\sigma$  recombinant proteins used in this study**

# Figure S2

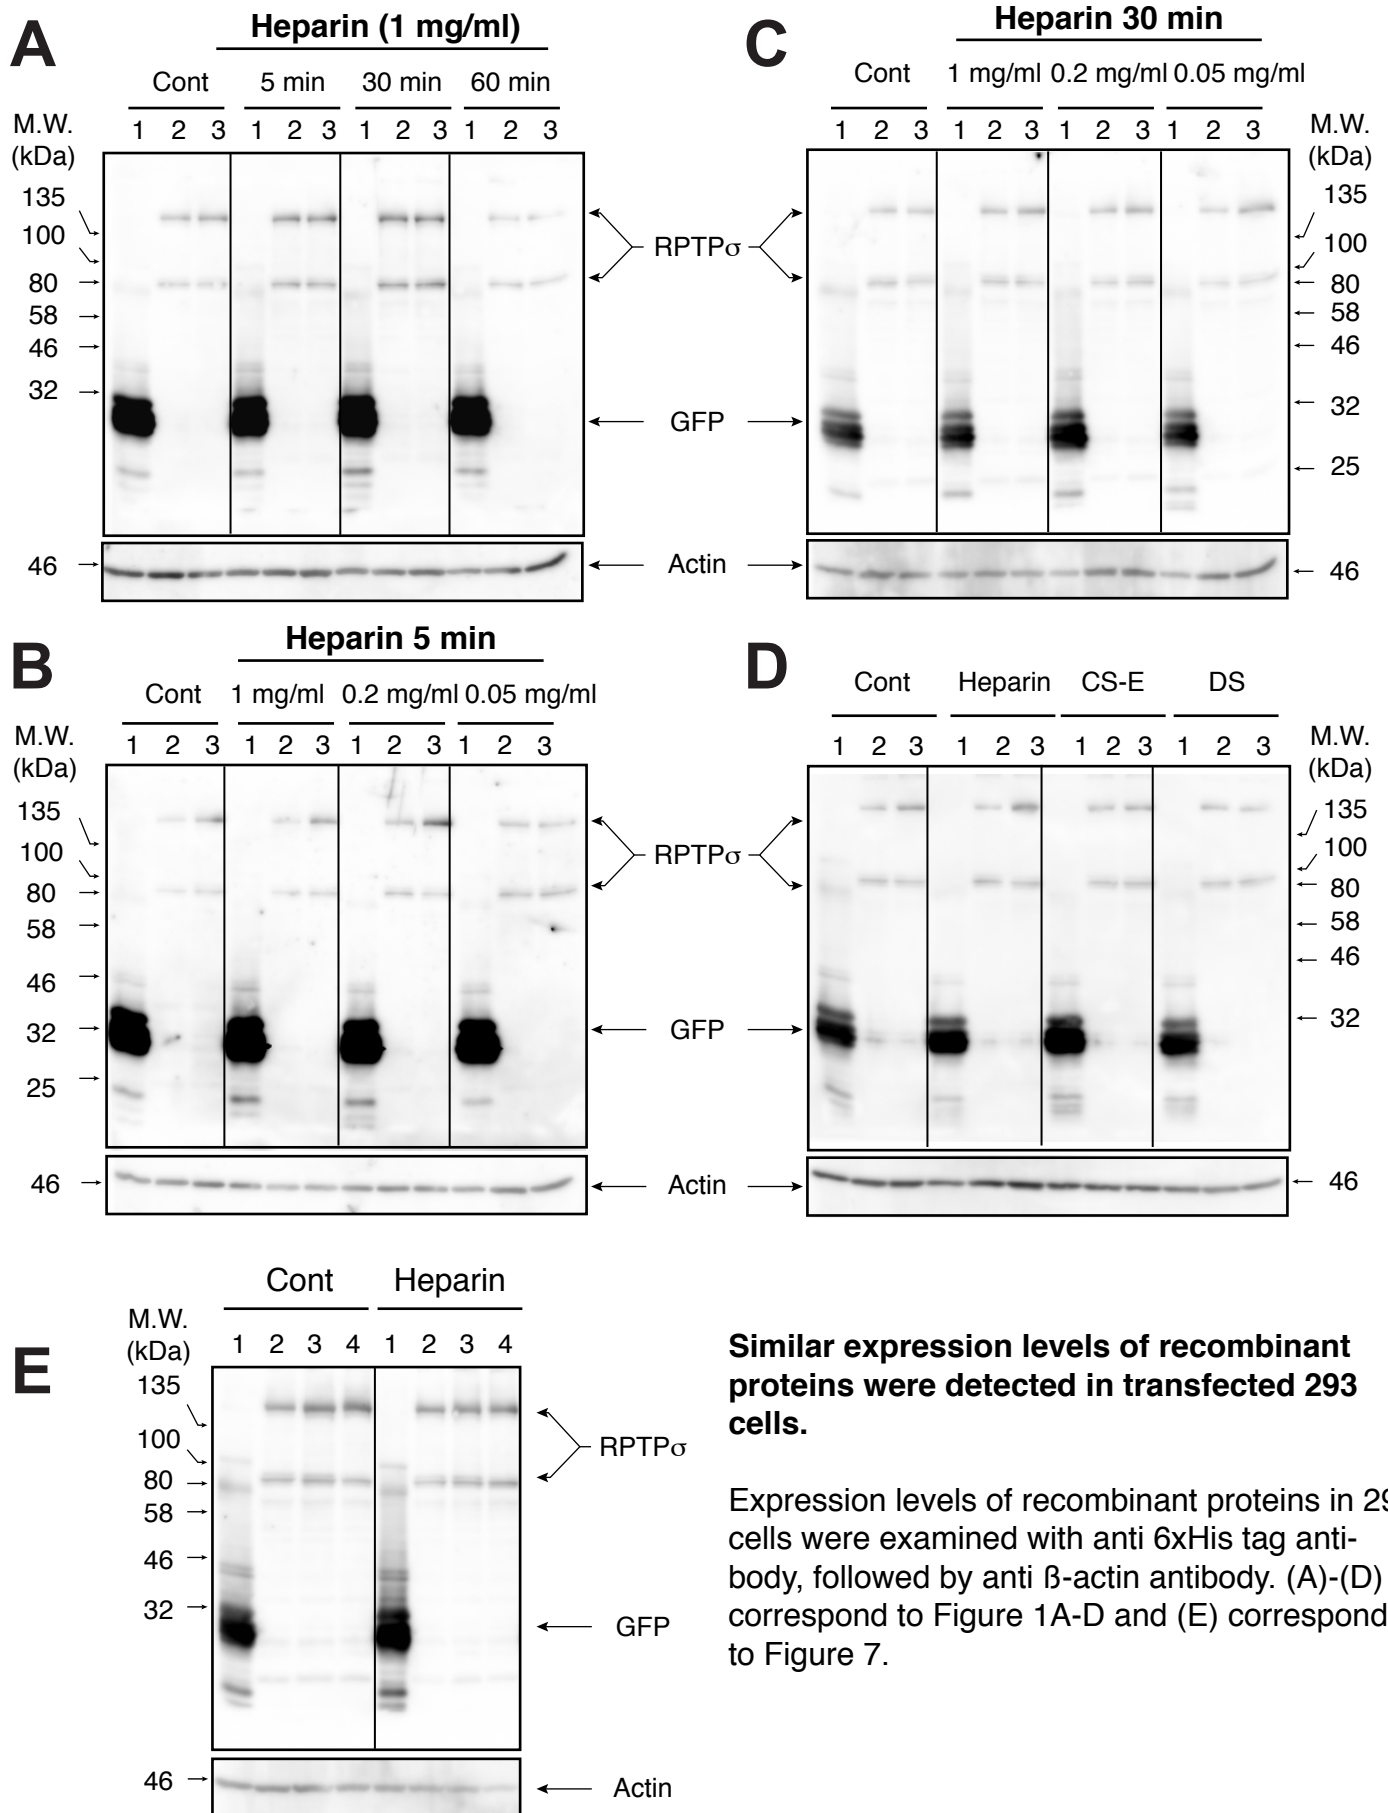

# Figure S3

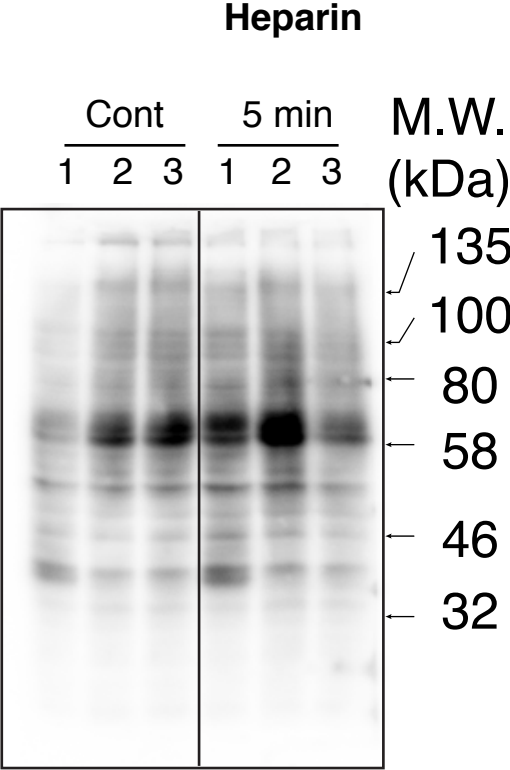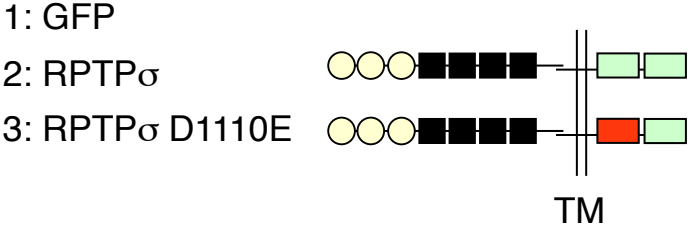

**Intact phosphatase domain of RPTP $\sigma$  is essential for the upregulated intracellular phosphorylation upon heparin exposure.**

293 cells expressing (1) GFP, (2) RPTP $\sigma$ , and (3) RPTP $\sigma$  D1110E (catalytically inactive form) were treated with heparin (1 mg/ml) for 5 min and Tyr phosphorylation was examined by immunoblot.

# Figure S4

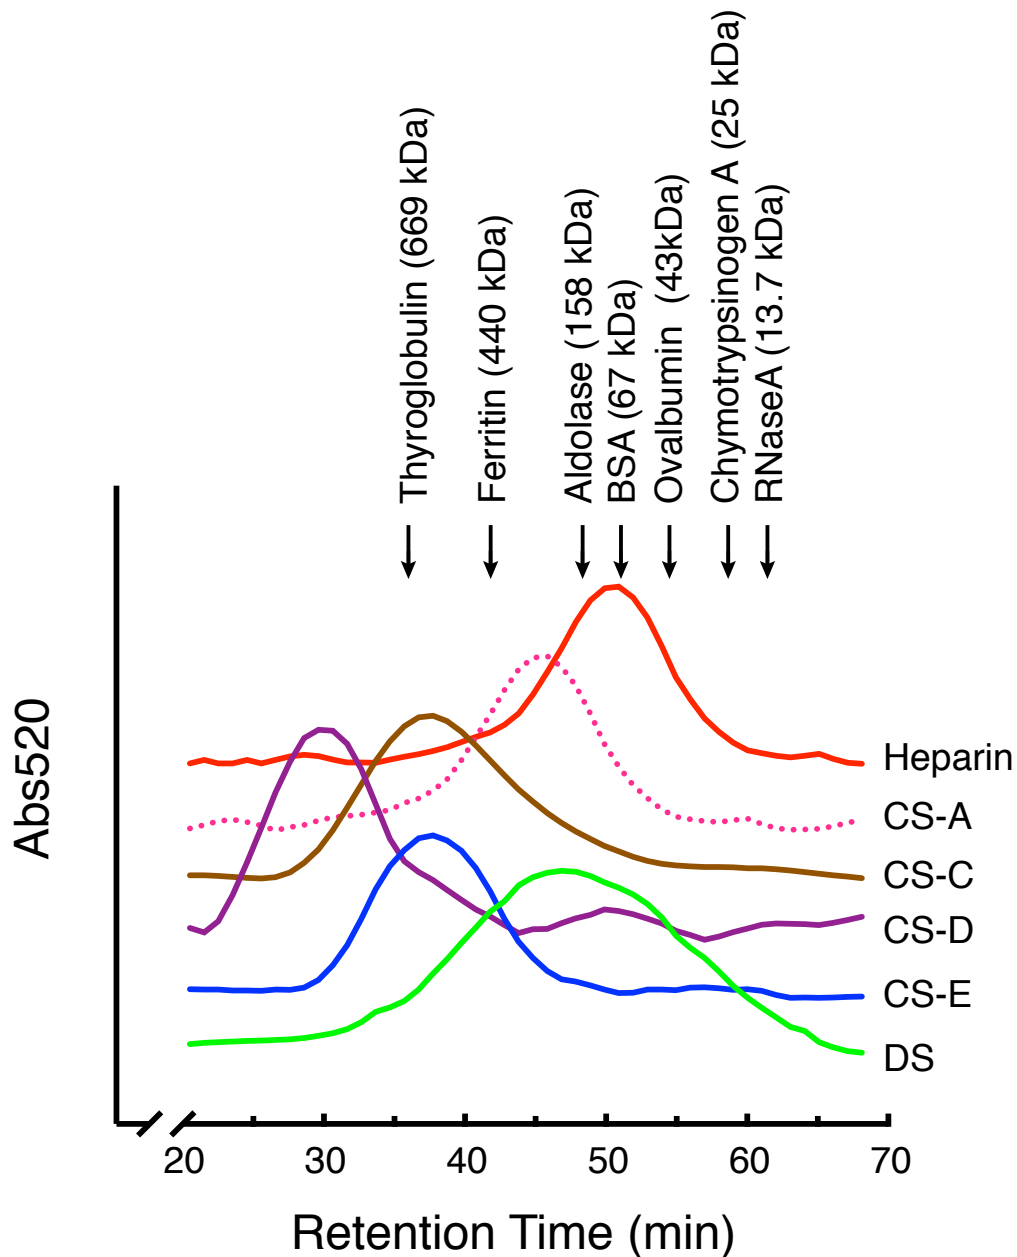

## Size exclusion chromatography of GAGs used in this study

Each GAG was separated in 150 mM ammonium bicarbonate by size-exclusion chromatography (Superdex 200, 10 x 300 mm, GE Healthcare Life Sciences) attached to a Shimadzu UFLC system at a flow rate of 0.3 ml/min. Amount of uronic acid in each fraction was measured by the carbazole method.

# Figure S5

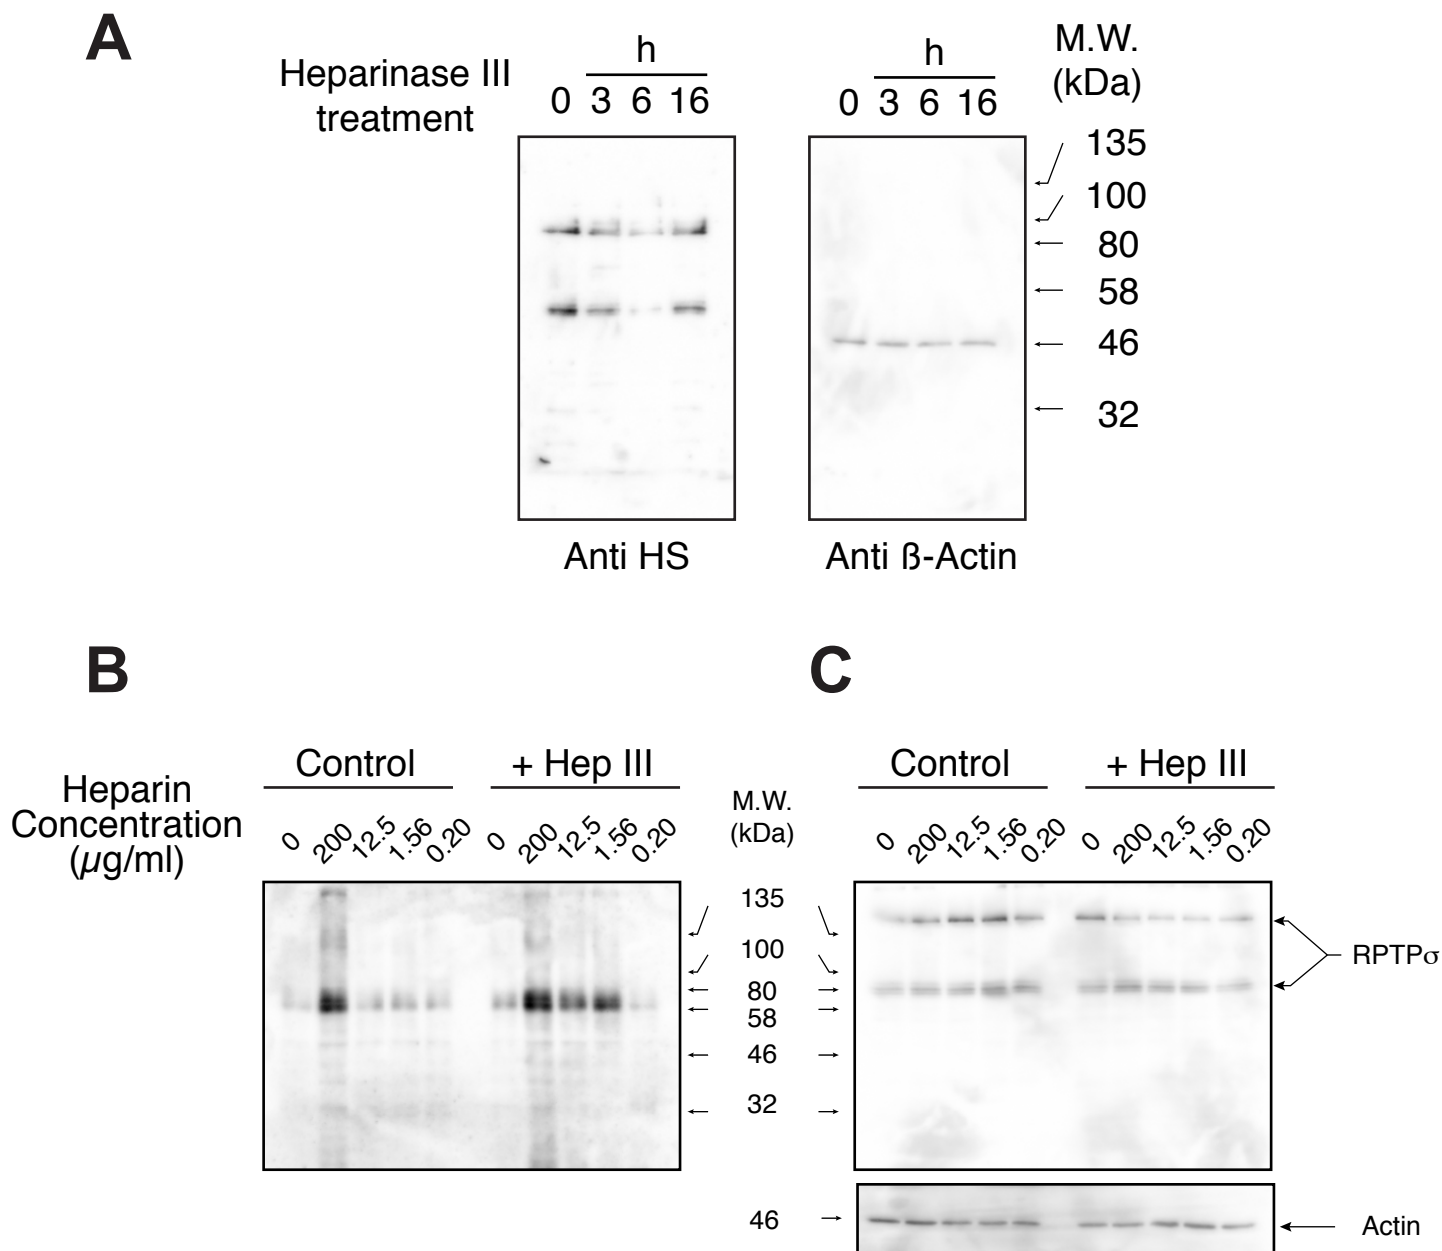

## Heparinase treatment of transfected cells increases the sensitivity to exogenous heparin

Transfected 293 cells with RPTP $\sigma$  (full length) were treated with heparinase III (Sigma, H8891). (A) At indicated time, cell lysates were collected with 1% TritonX100 in PBS containing Protease Inhibitor Cocktail (Sigma #539137), followed by immunoblot with anti HS antibody (F58-10E4, AMSBIO, # 370255). After stripping, PVDF membrane was reprobbed with anti  $\beta$ -actin antibody. (B) After 8 h treatment with heparinase III, cells were treated with heparin for 5 min and harvested with 2 x SDS sample buffer. Tyrosine phosphorylation was detected by immunoblot with anti-phosphotyrosine antibody. (C) Similar expression level of RPTP $\sigma$  was confirmed with anti-6xHis tag antibody, followed by reprobbed with anti  $\beta$ -actin antibody.

**Table S1****Disaccharide composition analysis of chondroitin and dermatan sulfate**

| Mol % | $\Delta$ Di-0S <sup>a</sup> | $\Delta$ Di-4S | $\Delta$ Di-6S | $\Delta$ Di-2,6S | $\Delta$ Di-4,6S | $\Delta$ Di-2,4,6S |
|-------|-----------------------------|----------------|----------------|------------------|------------------|--------------------|
| CS-A  | 6.3                         | 54.2           | 39.5           | 0                | 0                | 0                  |
| CS-C  | 13.9                        | 26.9           | 58.3           | 1.0              | 0                | 0                  |
| CS-D  | 2.2                         | 12.8           | 42.3           | 42.7             | 0                | 0                  |
| CS-E  | 3.4                         | 26.6           | 25.5           | 0                | 44.6             | 0                  |
| DS    | 7.7                         | 74.6           | 16.0           | 0.9              | 0.9              | 0                  |

**Disaccharide composition analysis of heparin**

| Mol %   | D0H0 <sup>b</sup> | D0A0 | D0H6 | D2H0 | D0S0 | D0A6 | D2A0 | D2H6 | D0S6 | D2S0 | D2A6 | D2S6 |
|---------|-------------------|------|------|------|------|------|------|------|------|------|------|------|
| Heparin | 0                 | 12.4 | 0    | 0    | 7.7  | 7.4  | 6.8  | 0    | 20.7 | 23.1 | 2.9  | 19.0 |

Unsaturated chondroitin disaccharides generated by digestion with chondroitinase ABC were analyzed by anion-exchange HPLC after labeling with the fluorophore 2AB as described in Experimental Procedures section. Analysis of heparin composition was performed by the UCSD Glycotechnology Core.

<sup>a</sup> $\Delta$ Di-0S= $\Delta$ HexUA-GalNAc;  $\Delta$ Di-6S= $\Delta$ HexUA-GalNAc(6-*O*-sulfate);  $\Delta$ Di-4S= $\Delta$ HexUA-GalNAc(4-*O*-sulfate);  $\Delta$ Di-2,6S= $\Delta$ HexUA(2-*O*-sulfate)-GalNAc(6-*O*-sulfate);  $\Delta$ Di-4,6S= $\Delta$ HexUA-GalNAc(4,6-*O*-disulfate);  $\Delta$ Di-2,4,6S= $\Delta$ HexUA(2-*O*-sulfate)-GalNAc(4,6-*O*-sulfate).

<sup>b</sup>D0H0,  $\Delta$ HexUA-GlcNH<sub>2</sub>; D0A0,  $\Delta$ HexUA-GlcNAc; D0H6,  $\Delta$ HexUA-GlcNH<sub>2</sub>-6S; D2H0,  $\Delta$ HexUA2S-GlcNH<sub>2</sub>; D0S0,  $\Delta$ HexUA-GlcNS; D0A6,  $\Delta$ HexUA-GlcNAc6S; D2A0,  $\Delta$ HexUA2S-GlcNAc; D2H6,  $\Delta$ HexUA2S-GlcNH<sub>2</sub>6S; D0S6,  $\Delta$ HexUA-GlcNS6S; D2S0,  $\Delta$ HexUA2S-GlcNS; D2A6,  $\Delta$ HexUA2S-GlcNAc6S; D2S6,  $\Delta$ HexUA2S-GlcNS6S.

**Table S2****Potential heparin binding sites within the fourth FNIII flanking region selected by “heparin protection” assays**

Peptides are sorted according to the position in RPTP $\sigma$ . Modified amino acids are shown as the addition of numbers; [+226.07760] indicates a modification by biotin and [+15.99492] indicates Met oxidation.

| Position | Sequence                                      | Observed<br>m/z | Calculated<br>m/z | ppm<br>error |
|----------|-----------------------------------------------|-----------------|-------------------|--------------|
| 667      | F.VLTNR[+226.07760]GSSL.G                     | 586.8114        | 586.8082          | 5.39         |
| 669      | L.TNRGSSLGGLQQTVTAR[+226.07760]TAF.N          | 764.3949        | 764.3902          | 6.10         |
| 669      | L.TNRGSSLGGLQQTVTAR[+226.07760].T             | 658.0101        | 658.0058          | 6.49         |
| 669      | L.TNR[+226.07760]GSSLGGLQQTVTAR.T             | 658.0094        | 658.0058          | 5.41         |
| 669      | L.TNR[+226.07760]GSSLGGLQQT.VT.A              | 872.9407        | 872.936           | 5.47         |
| 669      | L.TNR[+226.07760]GSSLGGLQQT.VT                | 822.4167        | 822.4121          | 5.55         |
| 671      | N.R[+226.07760]GSSLGGLQQT.VT.A                | 765.3954        | 765.3907          | 6.26         |
| 676      | L.GGLQQTVTAR[+226.07760]TAF.N                 | 788.4061        | 788.401           | 6.48         |
| 676      | L.GGLQQTVTAR[+226.07760].T                    | 628.8281        | 628.8244          | 5.89         |
| 684      | T.AR[+226.07760]TAF.N                         | 396.1991        | 396.1971          | 5.13         |
| 689      | F.NM[+15.99492]LSGK[+226.07760]PSVAPKPDNDGF.I | 706.0024        | 705.9994          | 4.22         |
| 689      | F.NM[+15.99492]LSGK[+226.07760]PS.V           | 538.2523        | 538.2492          | 5.86         |
| 689      | F.NMLSGK[+226.07760]PS.V                      | 530.2546        | 530.2517          | 5.41         |
| 692      | L.SGK[+226.07760]PSVAPKPDNDGFIVVY.L           | 739.378         | 739.3734          | 6.21         |
| 692      | L.SGKPSVAPK[+226.07760]PDNDGF.I               | 871.42          | 871.4143          | 6.57         |
| 697      | S.VAPK[+226.07760]PDNDGF.I                    | 643.3           | 643.2977          | 3.56         |
| 724      | Y.FIVM[+15.99492]VPL.R                        | 834.4849        | 834.4793          | 6.68         |
| 731      | L.RKSR[+226.07760]GGQFPVLL.G                  | 528.636         | 528.6328          | 6.03         |
| 732      | R.KSR[+226.07760]GGQFPVLL.G                   | 714.3995        | 714.395           | 6.26         |
| 732      | R.KSR[+226.07760]GGQFPVLL.G                   | 714.3994        | 714.395           | 6.09         |
| 733      | K.SR[+226.07760]GGQFPVLL.G                    | 650.3516        | 650.3475          | 6.30         |
| 733      | K.SR[+226.07760]GGQFPVLL.G                    | 650.3512        | 650.3475          | 5.64         |
| 754      | L.IQDISR[+226.07760]LQ.R                      | 599.8191        | 599.8161          | 5.05         |
| 754      | L.IQDISR[+226.07760]L.Q                       | 535.7903        | 535.7868          | 6.55         |
| 783      | F.SILPAVFHPGNQK[+226.07760]QY.G               | 962.9961        | 962.9905          | 5.76         |
| 788      | A.VFHPGNQK[+226.07760]QY.G                    | 722.3497        | 722.3455          | 5.75         |
| 790      | F.HPGNQK[+226.07760]QYGGF.D                   | 729.8372        | 729.8328          | 6.01         |
| 790      | F.HPGNQK[+226.07760]QY.G                      | 599.2809        | 599.2771          | 6.40         |
| 790      | F.HPGNQK[+226.07760]Q.Y                       | 517.7482        | 517.7454          | 5.26         |
| 801      | F.DNRGLEPGHR[+226.07760]YVLF.V                | 633.6529        | 633.6492          | 5.82         |
| 801      | F.DNRGLEPGHR[+226.07760]Y.V                   | 513.9119        | 513.9089          | 5.93         |
| 815      | F.VLAVLQK[+226.07760]NEPTF.A                  | 792.9311        | 792.9263          | 6.00         |
| 817      | L.AVLQK[+226.07760]NEPTF.A                    | 686.8535        | 686.8501          | 4.97         |
| 820      | L.QK[+226.07760]NEPTFAASPF.S                  | 781.8738        | 781.869           | 6.17         |
| 820      | L.QK[+226.07760]NEPTF.A                       | 545.2583        | 545.2553          | 5.48         |



**Table S3**

**DNA plasmids and oligonucleotides used in this study**

| DNA Plamid Name                                               | Gene of Interest | Protein Region | Vector Backbone | Cloning site(s)           | Mutations                                                               | Primers used        | Accession Number        |
|---------------------------------------------------------------|------------------|----------------|-----------------|---------------------------|-------------------------------------------------------------------------|---------------------|-------------------------|
| pTAG5-RPRP $\sigma$                                           | RPTP $\sigma$    | 1-1502         | pAPTAG5         | NheI(5') and XhoI(3')     | None                                                                    | 1,2                 | NM_001252456            |
| pTAG5-RPRP $\sigma$ $\Delta$ Lys                              | RPTP $\sigma$    | 1-1502         | pAPTAG5         | NheI(5') and XhoI(3')     | K68A, K69A, K71A, K72A                                                  | 1,2,4,5             | NM_001252456            |
| pTAG5-RPRP $\sigma$ D1110E                                    | RPTP $\sigma$    | 1-1502         | pAPTAG5         | NheI(5') and XhoI(3')     | D1110E                                                                  | 1,2,16,17           | NM_001252456            |
| pTAG5-RPRP $\sigma$ $\Delta$ Lys $\Delta$ RRRHR $\Delta$ HR   | RPTP $\sigma$    | 1-1502         | pAPTAG5         | NheI(5') and XhoI(3')     | K68A, K69A, K71A, K72A                                                  | 1,2,4,5,10-13,18,19 | NM_001252456            |
| pAPTAG5-RPRP $\sigma$                                         | RPTP $\sigma$    | 1-847          | pAPTAG5         | NheI(5') and HindIII (3') | None                                                                    | 1,3                 | NM_001252456            |
| pAPTAG5-RPRP $\sigma$ $\Delta$ Lys                            | RPTP $\sigma$    | 1-847          | pAPTAG5         | NheI(5') and HindIII (3') | K68A, K69A, K71A, K72A                                                  | 1,3-5               | NM_001252456            |
| pAPTAG5-RPRP $\sigma$ Ig1FN3                                  | RPTP $\sigma$    | 1-602          | pAPTAG5         | NheI(5') and HindIII (3') | None                                                                    | 1,6                 | NM_001252456            |
| pAPTAG5-RPRP $\sigma$ Ig1FN3 $\Delta$ Lys                     | RPTP $\sigma$    | 1-602          | pAPTAG5         | NheI(5') and HindIII (3') | K68A, K69A, K71A, K72A                                                  | 1,4-6               | NM_001252456            |
| pAPTAG5-RPRP $\sigma$ 4FN3                                    | RPTP $\sigma$    | 601-847        | pAPTAG5         | HindIII (5' and 3')       | None                                                                    | 3,8                 | NM_001252456            |
| pAPTAG5-RPTP $\sigma$ Ig1FN4                                  | RPTP $\sigma$    | 1-682          | pAPTAG5         | NheI(5') and HindIII (3') | None                                                                    | 1,7                 | NM_001252456            |
| pAPTAG5-RPTP $\sigma$ 4FN3 FLNK                               | RPTP $\sigma$    | 673-847        | pAPTAG5         | HindIII (5' and 3')       | None                                                                    | 3,9                 | NM_001252456            |
| pAPTAG5-RPTP $\sigma$ 4FN3AL                                  | RPTP $\sigma$    | 601-682        | pAPTAG5         | HindIII (5' and 3')       | None                                                                    | 8,9                 | NM_001252456            |
| pAPTAG5-RPTP $\sigma$ $\Delta$ 4FN3                           | RPTP $\sigma$    | 1-602, 673-847 | pAPTAG5         | NheI(5') and HindIII (3') | None                                                                    | 1,3,6,9             | NM_001252456            |
| pAPTAG5-RPTP $\sigma$ $\Delta$ 4FN3 $\Delta$ Lys              | RPTP $\sigma$    | 1-602, 673-847 | pAPTAG5         | NheI(5') and HindIII (3') | K68A, K69A, K71A, K72A                                                  | 1,3-6,9             | NM_001252456            |
| pAPTAG5-RPTP $\sigma$ $\Delta$ RRRHR                          | RPTP $\sigma$    | 1-847          | pAPTAG5         | NheI(5') and HindIII (3') | R762A, R763A, R766A, H767A, R769A                                       | 1,3,10-13           | NM_001252456            |
| pAPTAG5-RPTP $\sigma$ $\Delta$ Lys $\Delta$ RRRHR             | RPTP $\sigma$    | 1-847          | pAPTAG5         | NheI(5') and HindIII (3') | K68A, K69A, K71A, K72A, R762A, R763A, R766A, H767A, R769A               | 1,3-5,10-13         | NM_001252456            |
| pAPTAG5-RPTP $\sigma$ $\Delta$ HR                             | RPTP $\sigma$    | 1-847          | pAPTAG5         | NheI(5') and HindIII (3') | H809A, R810A                                                            | 1,3,18,19           | NM_001252456            |
| pAPTAG5-RPTP $\sigma$ $\Delta$ Lys $\Delta$ HR                | RPTP $\sigma$    | 1-847          | pAPTAG5         | NheI(5') and HindIII (3') | K69A, K71A, K72A, H809, R810A                                           | 1,3-5,18,19         | NM_001252456            |
| pAPTAG5-RPTP $\sigma$ $\Delta$ Lys $\Delta$ RRRHR $\Delta$ HR | RPTP $\sigma$    | 1-847          | pAPTAG5         | NheI(5') and HindIII (3') | K68A, K69A, K71A, K72A, R762A, R763A, R766A, H767A, R769A, H809A, R810A | 1,3-5,10-13,18,19   | NM_001252456            |
| pFUSE-RPTP $\sigma$                                           | RPTP $\sigma$    | 1-847          | pFUSE hIgl      | EcoRI(5') and EcoRV(3')   | None                                                                    | 14,15               | NM_001252456            |
| pGFPTAG5                                                      | EGFP             | 1-239          | pAPTAG5         | BspEI(5') and XhoI (3')   | None                                                                    | 20,21               | U55763                  |
| pGFPTAG5-RPTP $\sigma$                                        | RPTP $\sigma$    | 1-847          | pAPTAG5         | NheI(5') and HindIII (3') | None                                                                    | 1,3,20,21           | U55763,<br>NM_001252456 |
| pLNCX chick v-src                                             | v-src            |                | pLNCX           |                           |                                                                         |                     | NM_205457               |

**Table S3 (continued)**

| Oligonucleotides |                                                                  |
|------------------|------------------------------------------------------------------|
| Name             | Sequence                                                         |
| 1                | TGGCTAGCGCCGCCATGGCGCCACCTGGAGTCCCA                              |
| 2                | GAGCGCTTCCTCGAGTCCTGTTGCATAATGATCAAACTGC                         |
| 3                | GGACCCTCAGCCATTGTGGAAGCTTAC                                      |
| 4                | CCTAAGCCACGGGTGACCTGGAACgcccgcGGGagcGgcAGTGAACTCACAGCGCTTCGAGACC |
| 5                | GGTCTCGAAGCGCTGTGAGTTCAGTgcCgctCCCgcggeGTTCCAGGTCACCCGTGGCTTAGG  |
| 6                | gtaagcttCCTGCAGCGTGCCTGGCGCAC                                    |
| 7                | ttaagcttCAGTGACCGTCTGCTGCAGG                                     |
| 8                | atgaagcttacCTGCAGGCCATCTCCCCAAAG                                 |
| 9                | cgaagettaCAGCAGCCTGGGGGGCCTGC                                    |
| 10               | GACATCTCCCGGCTGCAGgcGgctAGCCTGCGCCACTCCAG                        |
| 11               | CTGGAGTGGCGCAGGCTagcCgcCTGCAGCCGGGAGATGTC                        |
| 12               | CAGgcGgctAGCCTGgcCgcCTCtgcgCAGCTGGAGGTGCCTC                      |
| 13               | GAGGCACCTCCAGCTGcgcaGAGgcGgcCAGGCTagcCgcCTG                      |
| 14               | AAGAATTCAAGCTGGCTAGCGCCGCCATGG                                   |
| 15               | TTGATATCCACAATGGGCTGAGGGTCC                                      |
| 16               | TGGGGTACTCAGGTACtCCGTGtTCGGGCCATGCCGT                            |
| 17               | ACGGCATGGCCCGAaCACGGaGTACCTGAGTACCCCA                            |
| 18               | GCACAAAGAGGACATAtgCgCCTGGCTCCAAGCC                               |
| 19               | GGCTTGGAGCCAGGcCgcTATGTCCTCTTTGTGC                               |
| 20               | aatccggaATGGTGAGCAAGGGCGAGGAGCTG                                 |
| 21               | aactcgagCTTGTACAGCTCGTCCATGC                                     |
